# Supplementary material for: Methanol tolerant, high performance, noble metal free electrocatalyst developed from polyaniline and ferric chloride for the oxygen reduction reaction
Source: Royal Society of Chemistry journal article supplement (doi:10.1039/c5ra17548h), 2015-01-01
Supplement: c5ra17548h1.pdf [file c5ra17548h1.pdf]

## Methanol tolerant, high performance, noble metal free electrocatalyst educed from Polyaniline and Ferric chloride for Oxygen reduction reaction

SankararaoMutyala<sup>a</sup>, JayaramanMathiyarasu<sup>\*a</sup>, Ashok Mulchandani<sup>b</sup>

<sup>a</sup>Electrodics and Electrocatalysis Division, CSIR-Central Electrochemical Research Institute,  
Karaikudi 630003, India. E-mail; al\_mathi@yahoo.com

<sup>b</sup>Department of Chemical and Environmental Engineering, University of California,  
Riverside, CA 92521, USA

### Supporting Information

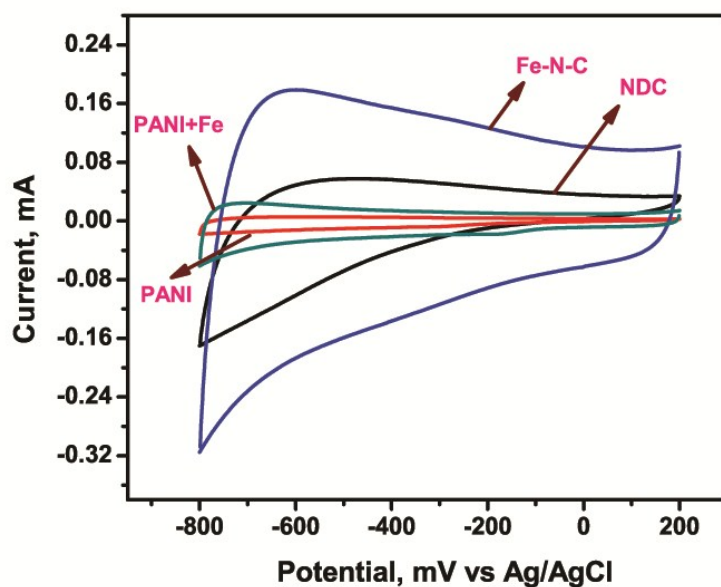

Figure S1: CV curves of respective electrocatalyst in 0.1 M KOH electrolyte, at scan rate 10  $\text{mV/s}^{-1}$
